# Supplementary material
Source: PubMed Central journal article supplement (PMC10894004)
Supplement: iyad077_supplementary_data.pdf [file iyad077_supplementary_data.pdf]

Figure S1

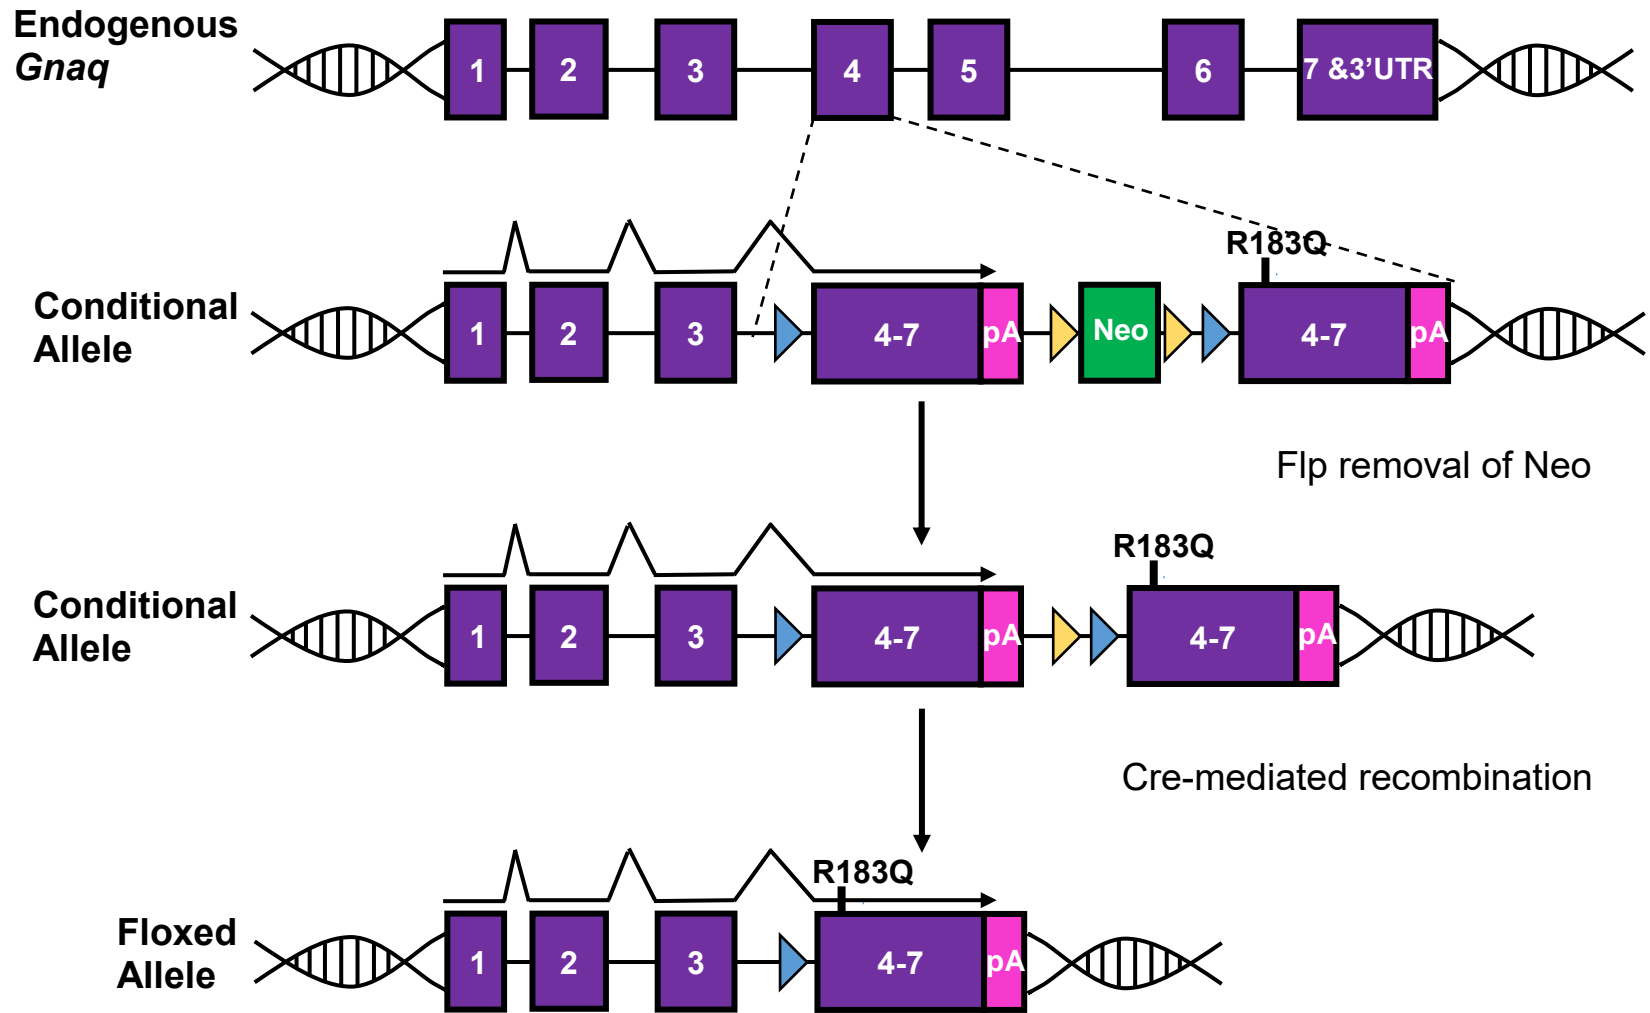

Figure S1. *Gnaq*RQ Mouse Gene Targeting Approach

Homologous recombination was used to replace the endogenous exon 4 of *Gnaq* with a construct allowing for Cre recombinase-dependent expression of p.R183Q GNAQ. The following elements were present in the targeting construct: 1) a cDNA block of mouse *Gnaq* exons 4-7 encoding the WT form of the protein, 2) a neomycin resistance cassette (green box) flanked by FRT sites (yellow triangles) for FRT-mediated recombination, 3) loxP sites (blue triangles) for Cre mediated recombination of the WT *Gnaq* cDNA block and the FRT site, and 4) a cDNA block of mouse *Gnaq* exons 4-7 encoding the p.R183Q mutant form of the protein. The 3'UTR and poly(A) site from Bovine growth hormone 1 (BGH1, pink block denoted pA) was ligated to the 3' end of exon 7 to provide a way to distinguish transcripts from the conditional allele from the endogenous *Gnaq*.

Figure S2

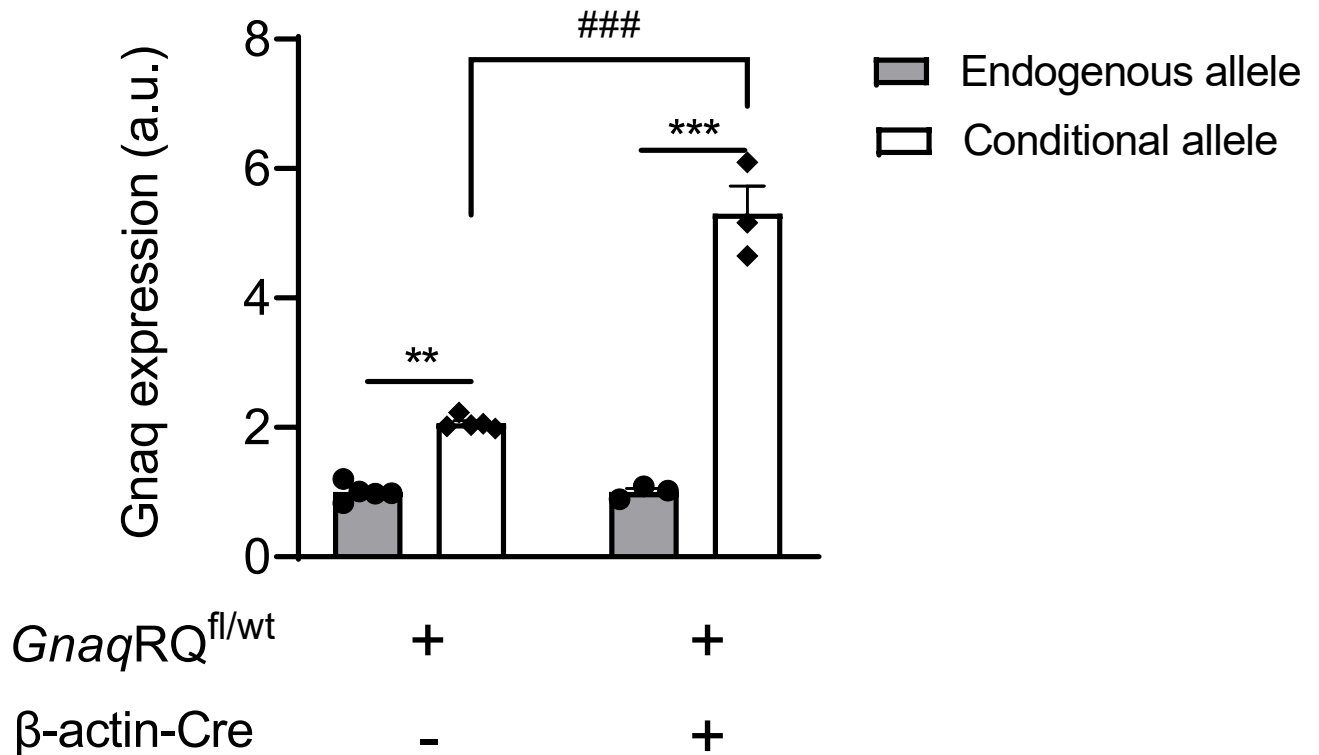

Figure S2. *Gnaq* transcript levels in embryos from  $GnaqRQ^{fl/wt} \times GnaqRQ^{fl/wt}; \beta\text{-actin-Cre}^+$  cross. qRT-PCR results from e14.5 embryonic mouse tissue from  $GnaqRQ^{fl/wt}$  and  $GnaqRQ^{fl/wt}; \beta\text{-actin-Cre}^+$  littermates using allele specific primers revealed that *Gnaq* conditional allele transcripts were significantly higher than transcripts from the endogenous allele in both groups ( $p^{***} = 0.0002$  and  $p^{**} = 0.007$  conditional vs endogenous allele, for  $GnaqRQ^{fl/wt}$  and  $GnaqRQ^{fl/wt}; \beta\text{-actin-Cre}^+$ , respectively, two tailed paired *t*-test) with a greater increase in  $GnaqRQ^{fl/wt}; \beta\text{-actin-Cre}^+$  ( $p^{###} < 0.001$   $GnaqRQ^{fl/wt}; \beta\text{-actin-Cre}^+$  vs  $GnaqRQ^{fl/wt}$ , two tailed unpaired *t*-test).
